# Supplementary material
Source: PubMed Central journal article supplement (PMC2613630)
Supplement: M807325200_1.pdf [file M807325200_1.pdf]

Figure S1

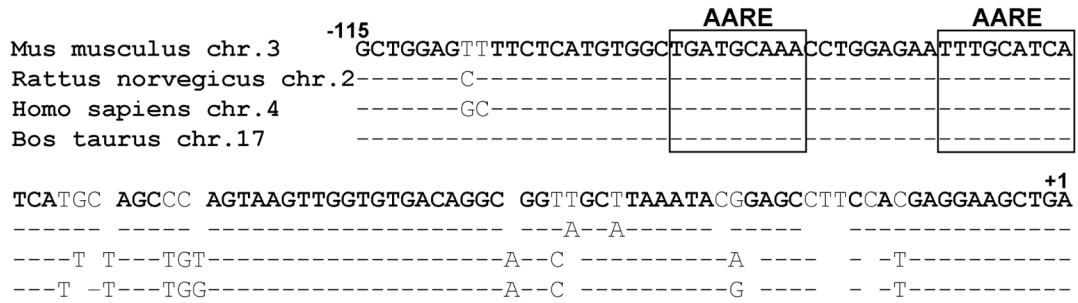

**Figure S1: The AAREs in the xCT promoter are evolutionarily conserved among mammalian species.** Sequence comparison of the proximal 115 bp of the murine 5' flanking region of the xCT promoter compared with the rat, human and bovine xCT promoter. The base pair numbers are according to Sato et al. (42) and are indicated above the murine xCT promoter sequence. Sequence identity is indicated as hyphens in the rat, human and bovine sequences and conserved stretches are shown in bold letters in the murine sequence. The two AAREs are indicated by boxes. The localization of the shown sequences is bp 9,793,083 to 9,792,968 on murine chromosome 3, 25,674,578 to 25,674,467 on rat chromosome 2, 63,711,766 to 63,711,654 on the human chromosome 4, and 2,520,785 to 2,520,897 on bovine chromosome 17.
